# Supplementary material
Source: Springer Nature journal article supplement (https://www.springermedizin.de/resource/supplementary/12882_2013_730_MOESM1_ESM.pdf/9454580)
Supplement: MOESM1 [file 9454580]

## Home Dialysis Patients Symptom Reference Form<sup>1</sup>

How bad are your symptoms of kidney disease?

Please look at the picture below to help you tell us about your symptoms.

You may choose a score of zero, which means "no symptoms", or a score of 10, which means "very bad symptoms". Otherwise, choose a point somewhere on the line between 0 to 10, which is equal to the severity of your symptoms.

|                        | No Symptoms |                   | Very Bad Symptoms |
|------------------------|-------------|-------------------|-------------------|
| 1. Shortness of breath | 0           | 1 2 3 4 5 6 7 8 9 | 10                |
| 2. Cough               | 0           | 1 2 3 4 5 6 7 8 9 | 10                |
| 3. Fatigue/tiredness   | 0           | 1 2 3 4 5 6 7 8 9 | 10                |
| 4. Lack of appetite    | 0           | 1 2 3 4 5 6 7 8 9 | 10                |
| 5. Nausea              | 0           | 1 2 3 4 5 6 7 8 9 | 10                |
| 6. Vomiting            | 0           | 1 2 3 4 5 6 7 8 9 | 10                |
| 7. Diarrhea            | 0           | 1 2 3 4 5 6 7 8 9 | 10                |
| 8. Constipation        | 0           | 1 2 3 4 5 6 7 8 9 | 10                |
| 9. Pain                | 0           | 1 2 3 4 5 6 7 8 9 | 10                |
| 10. Itching            | 0           | 1 2 3 4 5 6 7 8 9 | 10                |
| 11. Other: _____       | 0           | 1 2 3 4 5 6 7 8 9 | 10                |
|                        | No Symptoms |                   | Very Bad Symptoms |

### References:

<sup>1</sup> Murtagh FEM, Addington---Hall J, and Higginson IJ. The Prevalence of Symptoms in End---Stage Renal Disease: A Systematic Review. *Advances in Chronic Kidney Disease* 2007;14:82---99.
